# Supplementary material for: The role of Rubisco and cell walls in the interspecific variation in photosynthetic capacity
Source: Springer Nature journal article supplement (doi:10.1007/s00442-009-1315-z), 2009-03-13
Supplement: 442_2009_1315_MOESM1_ESM.pdf [file 442_2009_1315_MOESM1_ESM.pdf]

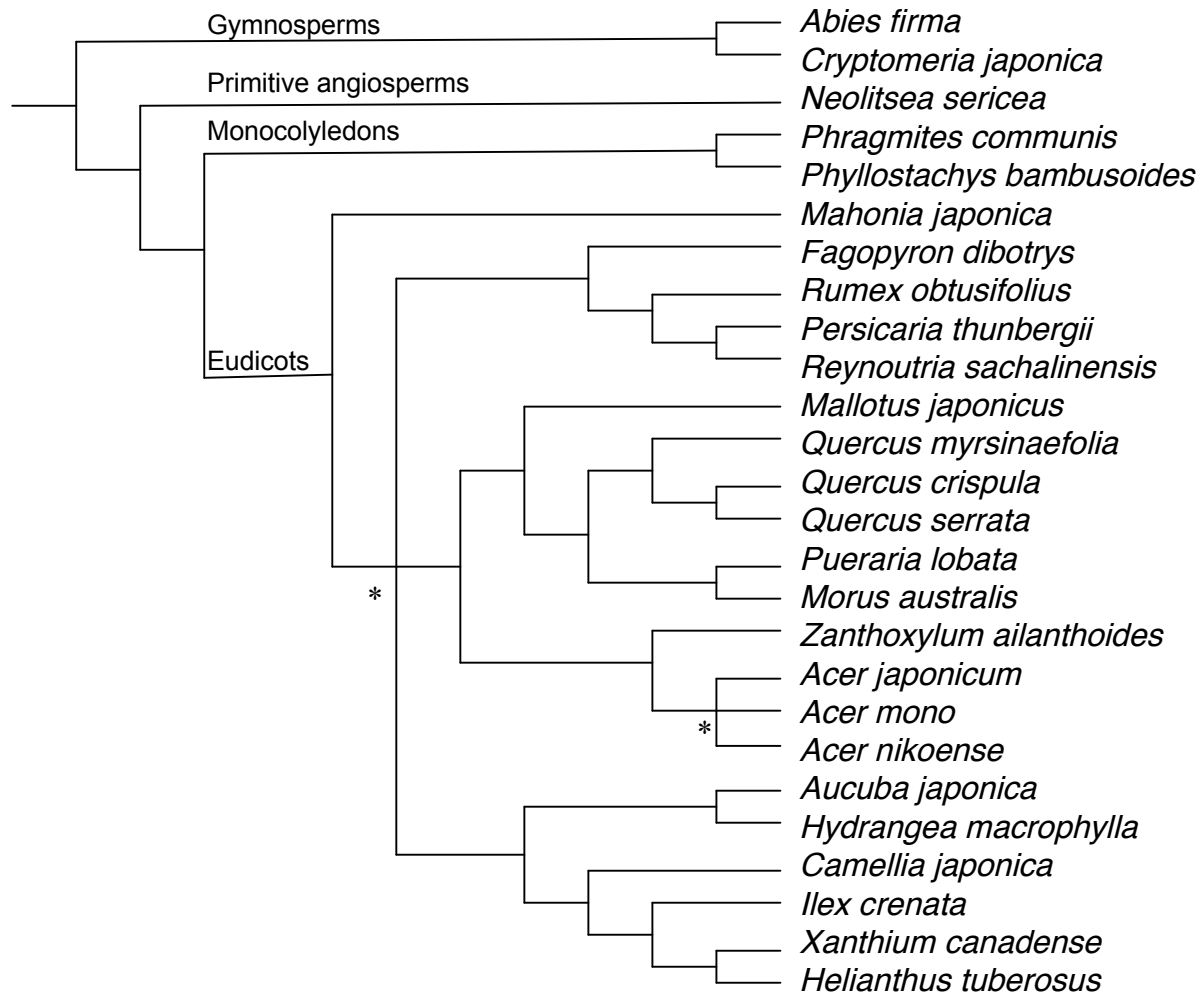

Figure S1. Phylogenetic tree of studied species. Note that branch lengths are not proportional to evolutionary time. The uncertain points are shown with asterisk (see text).
