# Supplementary material for: The role of Rubisco and cell walls in the interspecific variation in photosynthetic capacity
Source: Springer Nature journal article supplement (doi:10.1007/s00442-009-1315-z), 2009-03-13
Supplement: 442_2009_1315_MOESM2_ESM.pdf [file 442_2009_1315_MOESM2_ESM.pdf]

Table S1. Data of studied species. Mean + standard deviation are shown.

| Life form                    | Species                                                  | Family        | LMA            | LLS         |    | P <sub>area</sub> | P <sub>mass</sub> | PNUE         | N <sub>area</sub> | N <sub>mass</sub> | g <sub>s</sub> |
|------------------------------|----------------------------------------------------------|---------------|----------------|-------------|----|-------------------|-------------------|--------------|-------------------|-------------------|----------------|
| Annual herb                  | <i>Persicaria thunbergii</i> (Sieb. et Zucc.) H. Gross   | Polygonaceae  | 23.88 + 2.32   | 0.12        | NA | 17.08 + 1.68      | 718.3 + 85.8      | 249.2 + 28.8 | 0.069 + 0.009     | 4.09 + 0.17       | 0.80 + 0.08    |
|                              | <i>Xanthium canadense</i> Mil.                           | Compositae    | 30.45 ± 3.23   | 0.15        | NA | 28.70 ± 1.66      | 951.6 ± 123.9     | 322.4 ± 31.8 | 0.089 ± 0.004     | 4.14 ± 0.42       | 2.16 ± 0.39    |
| Perennial herb               | <i>Fagopyron dibotrys</i> (D. Don) H. Hara               | Polygonaceae  | 18.12 ± 0.86   | NA          | NA | 13.60 ± 0.81      | 750.6 ± 27.4      | 216.0 ± 13.0 | 0.063 ± 0.001     | 4.87 ± 0.25       | 0.57 ± 0.10    |
|                              | <i>Helianthus tuberosus</i> L.                           | Compositae    | 20.09 ± 1.51   | 0.16        | NA | 15.78 ± 1.09      | 789.9 ± 96.9      | 207.0 ± 11.0 | 0.076 ± 0.003     | 5.33 ± 0.43       | 0.82 ± 0.04    |
|                              | <i>Phragmites communis</i> Trin.                         | Poaceae       | 69.95 ± 3.20   | NA          | NA | 18.85 ± 3.20      | 268.7 ± 38.5      | 129.0 ± 19.5 | 0.146 ± 0.010     | 2.92 ± 0.10       | 0.34 ± 0.14    |
|                              | <i>Pueraria lobata</i> (Willd.) Ohwi                     | Leguminosae   | 38.89 ± 5.33   | NA          | NA | 18.63 ± 2.45      | 480.2 ± 31.0      | 158.1 ± 14.4 | 0.118 ± 0.014     | 4.26 ± 0.17       | 0.51 ± 0.12    |
|                              | <i>Reynoutria sachalinensis</i> (Fr. Schm.) Nakai        | Polygonaceae  | 39.35 ± 5.99   | 0.16        | NA | 19.07 ± 2.09      | 494.4 ± 97.5      | 169.6 ± 19.7 | 0.113 ± 0.007     | 4.05 ± 0.39       | 0.51 ± 0.05    |
| Deciduous tree               | <i>Rumex obtusifolius</i> L.                             | Polygonaceae  | 25.51 ± 3.35   | NA          | NA | 22.09 ± 1.30      | 874.2 ± 96.6      | 212.1 ± 15.6 | 0.104 ± 0.007     | 5.81 ± 0.92       | 0.75 ± 0.21    |
|                              | <i>Acer japonicum</i> Thunb.                             | Aceraceae     | 46.84 ± 4.97   | 0.53        | NA | 6.79 ± 0.49       | 146.7 ± 24.7      | 84.6 ± 12.2  | 0.081 ± 0.008     | 2.42 ± 0.08       | 0.09 ± 0.01    |
|                              | <i>Acer mono</i> Maxim. var <i>marmoratum</i>            | Aceraceae     | 65.34 ± 6.51   | 0.54        | NA | 10.65 ± 1.32      | 163.7 ± 20.2      | 85.2 ± 5.3   | 0.125 ± 0.013     | 2.68 ± 0.18       | 0.12 ± 0.01    |
|                              | <i>Acer nikoense</i> Maxim.                              | Aceraceae     | 49.16 ± 1.30   | 0.51        | NA | 6.97 ± 3.23       | 140.6 ± 62.5      | 83.6 ± 36.9  | 0.082 ± 0.004     | 2.35 ± 0.05       | 0.13 ± 0.08    |
|                              | <i>Mallotus japonicus</i> (Thunb. ex Murray) Muell. Arg. | Euphorbiaceae | 60.04 ± 7.88   | 0.45        | NA | 19.02 ± 2.49      | 317.1 ± 20.0      | 121.8 ± 13.8 | 0.157 ± 0.025     | 3.66 ± 0.21       | 0.44 ± 0.12    |
|                              | <i>Quercus crispula</i> Blume                            | Fagaceae      | 50.63 ± 0.13   | 0.53        | NA | 8.69 ± 0.50       | 171.6 ± 10.0      | 86.7 ± 6.8   | 0.100 ± 0.003     | 2.77 ± 0.08       | 0.11 ± 0.01    |
|                              | <i>Quercus serrata</i> Thunb. ex Murray                  | Fagaceae      | 69.39 ± 7.01   | 0.54        | NA | 12.38 ± 0.54      | 180.0 ± 21.7      | 95.4 ± 4.2   | 0.130 ± 0.003     | 2.64 ± 0.23       | 0.16 ± 0.01    |
|                              | <i>Zanthoxylum ailanthoides</i> Sieb. et Zucc.           | Rutaceae      | 34.99 ± 4.74   | NA          | NA | 17.09 ± 1.76      | 495.0 ± 80.1      | 160.0 ± 5.2  | 0.107 ± 0.011     | 4.34 ± 0.77       | 0.60 ± 0.06    |
|                              | <i>Hydrangea macrophylla</i>                             | Hydrangeaceae | 53.96 ± 12.37  | 0.51        | NA | 12.36 ± 0.62      | 238.0 ± 59.1      | 127.9 ± 23.0 | 0.099 ± 0.017     | 2.58 ± 0.17       | 0.27 ± 0.05    |
|                              | <i>Morus australis</i> Poir.                             | Moraceae      | 51.73 ± 25.98  | 0.36        | NA | 15.23 ± 1.44      | 357.4 ± 167.9     | 119.1 ± 40.6 | 0.141 ± 0.053     | 4.05 ± 0.64       | 0.68 ± 0.27    |
| Evergreen broad-leaved tree  | <i>Camellia japonica</i> L.                              | Theaceae      | 142.70 ± 12.23 | 2.90 ± 0.30 |    | 7.30 ± 2.42       | 52.1 ± 19.0       | 48.0 ± 17.3  | 0.156 ± 0.021     | 1.53 ± 0.13       | 0.08 ± 0.04    |
|                              | <i>Neolitsea sericea</i> (Bl.) Koidz.                    | Lauraceae     | 56.23 ± 5.64   | 2.20 ± 0.45 |    | 6.44 ± 0.77       | 115.1 ± 16.3      | 77.2 ± 4.9   | 0.083 ± 0.008     | 2.08 ± 0.16       | 0.09 ± 0.01    |
|                              | <i>Phyllostachys bambusoides</i> Sieb. et Zucc.          | Poaceae       | 64.16 ± 1.81   | 1.00 ± 0.00 |    | 8.96 ± 1.07       | 139.7 ± 17.0      | 78.3 ± 10.0  | 0.115 ± 0.006     | 2.50 ± 0.06       | 0.10 ± 0.01    |
| Evergreen broad-leaved shrub | <i>Quercus myrsinaefolia</i> Blume                       | Fagaceae      | 79.25 ± 3.43   | 1.00 ± 0.00 |    | 6.34 ± 0.39       | 80.0 ± 1.4        | 63.2 ± 1.8   | 0.100 ± 0.004     | 1.77 ± 0.03       | 0.08 ± 0.01    |
|                              | <i>Aucuba japonica</i> Thunb.                            | Cornaceae     | 61.61 ± 3.44   | 2.00 ± 0.33 |    | 6.56 ± 1.68       | 106.4 ± 27.4      | 60.0 ± 17.1  | 0.110 ± 0.006     | 2.50 ± 0.12       | 0.07 ± 0.04    |
|                              | <i>Ilex crenata</i> Thunb.                               | Aquifoliaceae | 106.06 ± 5.09  | 4.50 ± 0.40 |    | 11.74 ± 2.03      | 111.3 ± 22.4      | 79.6 ± 15.4  | 0.148 ± 0.004     | 1.96 ± 0.04       | 0.14 ± 0.04    |
|                              | <i>Mahonia japonica</i> (Thunb.) DC.                     | Berberidaceae | 92.85 ± 12.87  | 4.60 ± 0.40 |    | 7.02 ± 0.85       | 76.2 ± 10.4       | 64.2 ± 11.5  | 0.111 ± 0.017     | 1.67 ± 0.08       | 0.09 ± 0.02    |
|                              | <i>Abies firma</i> Sieb. et Zucc.                        | Pinaceae      | 163.57 ± 25.54 | 7.30 ± 1.51 |    | 7.17 ± 1.27       | 42.0 ± 6.4        | 53.6 ± 5.2   | 0.127 ± 0.013     | 1.10 ± 0.14       | 0.09 ± 0.02    |
| Evergreen conifer            | <i>Cryptomeria japonica</i> (L. fil.) D. Don             | Taxodiaceae   | 90.65 + 7.97   | 4.80 + 0.06 |    | 4.67 + 1.11       | 51.2 + 9.3        | 39.3 + 9.2   | 0.119 + 0.012     | 1.84 + 0.10       | 0.05 + 0.01    |

LMA, leaf mass per area ( $\text{g m}^{-2}$ ); LLS, leaf life span (year); P<sub>area</sub>, photosynthetic rate per area ( $\mu\text{mol m}^{-2} \text{s}^{-1}$ ); P<sub>mass</sub>, photosynthetic rate per mass ( $\text{nmol g}^{-1} \text{s}^{-1}$ ); PNUE, photosynthetic nitrogen use efficiency ( $\mu\text{mol mol}^{-1} \text{s}^{-1}$ ); N<sub>area</sub>, leaf nitrogen per area ( $\text{mol m}^{-2}$ ); N<sub>mass</sub>, leaf nitrogen per mass (%); g<sub>s</sub>, stomatal conductance for water vapour ( $\text{mol m}^{-2} \text{s}^{-1}$ ); C<sub>i</sub>/C<sub>a</sub>, the ratio of CO<sub>2</sub> concentration at intercellular space to that at air; R<sub>area</sub>, Rubisco per area ( $\text{g m}^{-2}$ ); R<sub>mass</sub>, Rubisco per leaf mass ( $\text{g g}^{-1}$ ); RNF, Rubisco nitrogen per leaf nitrogen ( $\text{mol mol}^{-1}$ ); RBUE, photosynthetic rate per Rubisco ( $\mu\text{mol g}^{-1} \text{s}^{-1}$ ); WM, cell wall mass per area ( $\text{g m}^{-2}$ ); WMF, cell wall mass per leaf mass ( $\text{g g}^{-1}$ ); WN, cell wall nitrogen per area ( $\text{mol m}^{-2}$ ); WNF, cell wall nitrogen per leaf nitrogen ( $\text{mol mol}^{-1}$ ); WNC, nitrogen concentration of cell wall (%); NA, not available.

| $C_p/C_n$   | $R_{area}$  | $R_{mass}$    | RNF           | RBUE         | WM           | WMF         | WN              | WNF           | WNC         |
|-------------|-------------|---------------|---------------|--------------|--------------|-------------|-----------------|---------------|-------------|
| 0.87 ± 0.01 | 1.98 ± 0.09 | 0.084 ± 0.010 | 0.331 ± 0.042 | 8.63 ± 0.69  | 12.1 ± 0.9   | 0.52 ± 0.07 | 0.0047 ± 0.0006 | 0.067 ± 0.002 | 0.54 ± 0.10 |
| 0.89 ± 0.01 | 2.08 ± 0.31 | 0.068 ± 0.005 | 0.267 ± 0.038 | 14.01 ± 2.18 | 12.4 ± 1.9   | 0.41 ± 0.03 | 0.0037 ± 0.0009 | 0.042 ± 0.011 | 0.46 ± 0.17 |
| 0.86 ± 0.02 | 1.12 ± 0.09 | 0.060 ± 0.006 | 0.203 ± 0.016 | 12.51 ± 0.73 | 6.6 ± 0.4    | 0.36 ± 0.01 | 0.0013 ± 0.0011 | 0.013 ± 0.009 | 0.28 ± 0.23 |
| 0.88 ± 0.01 | NA NA       | NA NA         | NA NA         | NA NA        | NA NA        | NA NA       | NA NA           | NA NA         | NA NA       |
| 0.68 ± 0.10 | 3.14 ± 0.35 | 0.045 ± 0.003 | 0.245 ± 0.010 | 5.91 ± 1.48  | 41.4 ± 8.0   | 0.59 ± 0.13 | 0.0080 ± 0.0013 | 0.054 ± 0.004 | 0.28 ± 0.06 |
| 0.80 ± 0.02 | 1.44 ± 0.13 | 0.036 ± 0.002 | 0.137 ± 0.005 | 13.37 ± 1.27 | 13.8 ± 0.4   | 0.35 ± 0.05 | 0.0034 ± 0.0004 | 0.028 ± 0.000 | 0.34 ± 0.05 |
| 0.79 ± 0.02 | 3.11 ± 0.51 | 0.077 ± 0.001 | 0.313 ± 0.035 | 6.05 ± 1.29  | 13.2 ± 3.2   | 0.33 ± 0.04 | 0.0068 ± 0.0030 | 0.060 ± 0.023 | 0.70 ± 0.14 |
| 0.81 ± 0.07 | 2.74 ± 0.32 | 0.108 ± 0.011 | 0.301 ± 0.037 | 8.10 ± 0.48  | 8.5 ± 1.1    | 0.33 ± 0.03 | 0.0022 ± 0.0007 | 0.022 ± 0.007 | 0.37 ± 0.08 |
| 0.66 ± 0.03 | 0.97 ± 0.02 | 0.021 ± 0.002 | 0.138 ± 0.015 | 7.00 ± 0.53  | 19.6 ± 1.8   | 0.42 ± 0.07 | 0.0051 ± 0.0011 | 0.064 ± 0.014 | 0.37 ± 0.10 |
| 0.60 ± 0.05 | 2.05 ± 0.46 | 0.031 ± 0.006 | 0.181 ± 0.024 | 5.48 ± 0.65  | 24.8 ± 4.3   | 0.37 ± 0.07 | 0.0041 ± 0.0014 | 0.032 ± 0.013 | 0.24 ± 0.09 |
| 0.72 ± 0.05 | 1.65 ± 0.03 | 0.034 ± 0.001 | 0.229 ± 0.009 | 4.23 ± 2.00  | 17.8 ± 2.4   | 0.36 ± 0.05 | 0.0046 ± 0.0014 | 0.056 ± 0.020 | 0.37 ± 0.13 |
| 0.76 ± 0.04 | 2.18 ± 0.50 | 0.037 ± 0.005 | 0.164 ± 0.028 | 8.72 ± 0.72  | 18.7 ± 1.9   | 0.33 ± 0.05 | 0.0025 ± 0.0010 | 0.017 ± 0.009 | 0.19 ± 0.07 |
| 0.64 ± 0.02 | 2.28 ± 0.43 | 0.045 ± 0.009 | 0.259 ± 0.043 | 3.94 ± 1.05  | 28.4 ± 15.5  | 0.56 ± 0.31 | 0.0037 ± 0.0014 | 0.037 ± 0.014 | 0.23 ± 0.14 |
| 0.65 ± 0.02 | 3.00 ± 0.38 | 0.041 ± 0.006 | 0.262 ± 0.033 | 4.16 ± 0.36  | 31.7 ± 5.9   | 0.44 ± 0.08 | 0.0143 ± 0.0035 | 0.109 ± 0.027 | 0.62 ± 0.04 |
| 0.83 ± 0.02 | 2.16 ± 0.42 | 0.068 ± 0.014 | 0.220 ± 0.019 | 8.12 ± 0.56  | 10.8 ± 1.6   | 0.34 ± 0.06 | 0.0025 ± 0.0006 | 0.023 ± 0.003 | 0.33 ± 0.09 |
| 0.77 ± 0.04 | 2.19 ± 0.49 | 0.041 ± 0.001 | 0.252 ± 0.015 | 5.86 ± 1.41  | 20.5 ± 6.8   | 0.38 ± 0.08 | 0.0022 ± 0.0010 | 0.022 ± 0.007 | 0.15 ± 0.04 |
| 0.86 ± 0.05 | 3.57 ± 1.94 | 0.057 ± 0.011 | 0.246 ± 0.070 | 5.89 ± 4.37  | 20.2 ± 10.2  | 0.33 ± 0.04 | 0.0066 ± 0.0050 | 0.038 ± 0.024 | 0.40 ± 0.19 |
| 0.58 ± 0.06 | 2.70 ± 0.71 | 0.019 ± 0.004 | 0.196 ± 0.034 | 2.69 ± 1.62  | 65.0 ± 19.9  | 0.44 ± 0.09 | 0.0154 ± 0.0044 | 0.098 ± 0.015 | 0.33 ± 0.02 |
| 0.65 ± 0.07 | 1.42 ± 0.20 | 0.025 ± 0.002 | 0.186 ± 0.016 | 4.80 ± 0.71  | 37.7 ± 9.2   | 0.65 ± 0.11 | 0.0078 ± 0.0015 | 0.089 ± 0.013 | 0.29 ± 0.05 |
| 0.60 ± 0.04 | 2.12 ± 0.18 | 0.033 ± 0.002 | 0.213 ± 0.011 | 4.03 ± 0.64  | 41.3 ± 1.5   | 0.65 ± 0.04 | 0.0063 ± 0.0021 | 0.057 ± 0.022 | 0.21 ± 0.06 |
| 0.63 ± 0.02 | 1.15 ± 0.08 | 0.015 ± 0.001 | 0.132 ± 0.014 | 5.53 ± 0.55  | 41.9 ± 3.8   | 0.53 ± 0.05 | 0.0131 ± 0.0012 | 0.131 ± 0.008 | 0.44 ± 0.04 |
| 0.55 ± 0.09 | NA NA       | NA NA         | NA NA         | NA NA        | NA NA        | NA NA       | NA NA           | NA NA         | NA NA       |
| 0.59 ± 0.14 | NA NA       | NA NA         | NA NA         | NA NA        | NA NA        | NA NA       | NA NA           | NA NA         | NA NA       |
| 0.64 ± 0.04 | 1.89 ± 0.15 | 0.019 ± 0.000 | 0.181 ± 0.009 | 3.73 ± 0.28  | 54.2 ± 2.5   | 0.55 ± 0.02 | 0.0077 ± 0.0026 | 0.065 ± 0.024 | 0.20 ± 0.08 |
| 0.62 ± 0.08 | 2.72 ± 0.30 | 0.017 NA      | 0.245 NA      | 2.64 NA      | 103.8 ± 13.4 | 0.63 NA     | 0.0412 ± 0.0097 | 0.324 NA      | 0.56 ± 0.07 |
| 0.58 ± 0.05 | 1.86 ± 0.12 | 0.021 NA      | 0.179 NA      | 2.51 NA      | 45.5 ± 3.8   | 0.50 NA     | 0.0103 ± 0.0018 | 0.087 NA      | 0.32 ± 0.08 |
