# Supplementary material for: The role of Rubisco and cell walls in the interspecific variation in photosynthetic capacity
Source: Springer Nature journal article supplement (doi:10.1007/s00442-009-1315-z), 2009-03-13
Supplement: 442_2009_1315_MOESM3_ESM.pdf [file 442_2009_1315_MOESM3_ESM.pdf]

Table S2. Correlation between leaf traits across species. The standardized major axis (SMA) test was applied for real values (A) and log<sub>10</sub>-transformed values (B). The phylogenetic independent contrast (PIC) analysis was applied for log<sub>10</sub>-transformed values (C).

| Y                              | X                 | n  | A) SMA test for real values |     |         |         | B) SMA test for log-transformed values |     |         |        | C) PIC analysis for log-transformed values |     |
|--------------------------------|-------------------|----|-----------------------------|-----|---------|---------|----------------------------------------|-----|---------|--------|--------------------------------------------|-----|
|                                |                   |    | R <sup>2</sup>              | P   | Slope   | Interc  | R <sup>2</sup>                         | P   | Slope   | Interc | R <sup>2</sup>                             | P   |
| LLS                            | LMA               | 21 | 0.716                       | *** | 0.0562  | -2.136  | 0.781                                  | *** | 2.406   | -4.357 | 0.689                                      | *** |
| P <sub>area</sub>              | LMA               | 26 | 0.291                       | **  | -0.1733 | 23.36   | 0.361                                  | *** | -0.8773 | 2.569  | 0.090                                      | ns  |
| P <sub>mass</sub>              | LMA               | 26 | 0.518                       | *** | -8.037  | 815.9   | 0.821                                  | *** | -1.695  | 5.259  | 0.672                                      | *** |
| PNUE                           | LMA               | 26 | 0.492                       | *** | -2.011  | 246.9   | 0.742                                  | *** | -0.983  | 3.724  | 0.504                                      | *** |
| N <sub>area</sub>              | LMA               | 26 | 0.377                       | *** | 0.0007  | 0.06431 | 0.5                                    | *** | 0.4455  | -1.739 | 0.533                                      | *** |
| N <sub>mass</sub>              | LMA               | 26 | 0.653                       | *** | -0.0356 | 5.274   | 0.819                                  | *** | -0.7605 | 1.765  | 0.723                                      | *** |
| g <sub>s</sub>                 | LMA               | 26 | 0.273                       | **  | -0.0127 | 1.166   | 0.566                                  | *** | -1.833  | 2.522  | 0.325                                      | **  |
| C <sub>i</sub> /C <sub>a</sub> | LMA               | 26 | 0.518                       | *** | -0.0032 | 0.9075  | 0.666                                  | *** | -0.282  | 0.334  | 0.462                                      | *** |
| R <sub>area</sub>              | LMA               | 23 | 0.051                       | ns  | 0.0197  | 0.9383  | 0.059                                  | ns  | 0.651   | -0.817 | 0.152                                      | +   |
| R <sub>mass</sub>              | LMA               | 23 | 0.462                       | *** | -0.0007 | 0.08663 | 0.659                                  | *** | -1.053  | 0.396  | 0.490                                      | *** |
| RNF                            | LMA               | 23 | 0.061                       | ns  | -0.0016 | 0.3178  | 0.09                                   | ns  | -0.4863 | 0.172  | 0.020                                      | ns  |
| RBUE                           | LMA               | 23 | 0.454                       | *** | -0.0933 | 12.18   | 0.682                                  | *** | -0.9185 | 2.347  | 0.640                                      | *** |
| WM                             | LMA               | 23 | 0.914                       | *** | 0.6384  | -9.356  | 0.908                                  | *** | 1.302   | -0.876 | 0.903                                      | *** |
| WMF                            | LMA               | 23 | 0.231                       | *   | 0.0032  | 0.2535  | 0.248                                  | *   | 0.456   | -1.147 | 0.029                                      | ns  |
| WN                             | LMA               | 23 | 0.71                        | *** | 0.0002  | -0.0068 | 0.657                                  | *** | 1.45    | -4.762 | 0.608                                      | *** |
| WNF                            | LMA               | 23 | 0.599                       | *** | 0.0018  | -0.0459 | 0.48                                   | *** | 1.392   | -3.708 | 0.384                                      | *** |
| WNC                            | LMA               | 23 | 0.001                       | ns  | 0.004   | 0.1087  | 0.009                                  | ns  | -0.7379 | 0.798  | 0.004                                      | ns  |
| P <sub>area</sub>              | LLS               | 21 | 0.235                       | *   | -2.96   | 16.29   | 0.558                                  | *** | -0.3808 | 0.973  | 0.410                                      | **  |
| P <sub>mass</sub>              | LLS               | 21 | 0.276                       | *   | -129.8  | 474.6   | 0.842                                  | *** | -0.7207 | 2.175  | 0.846                                      | *** |
| PNUE                           | LLS               | 21 | 0.273                       | *   | -35.52  | 169.2   | 0.764                                  | *** | -0.4318 | 1.938  | 0.740                                      | *** |
| N <sub>area</sub>              | LLS               | 21 | 0.127                       | ns  | 0.0129  | 0.08957 | 0.211                                  | *   | 0.1911  | -0.95  | 0.212                                      | *   |
| N <sub>mass</sub>              | LLS               | 21 | 0.485                       | *** | -0.5351 | 3.636   | 0.808                                  | *** | -0.3139 | 0.38   | 0.689                                      | *** |
| g <sub>s</sub>                 | LLS               | 21 | 0.148                       | +   | -0.2412 | 0.7385  | 0.635                                  | *** | -0.819  | -0.804 | 0.624                                      | *** |
| C <sub>i</sub> /C <sub>a</sub> | LLS               | 21 | 0.31                        | **  | -0.0555 | 0.7831  | 0.652                                  | *** | -0.1252 | -0.177 | 0.608                                      | *** |
| R <sub>area</sub>              | LLS               | 18 | 0                           | ns  | 0.3295  | 1.646   | 0.012                                  | ns  | -0.2757 | 0.283  | 0.001                                      | ns  |
| R <sub>mass</sub>              | LLS               | 18 | 0.334                       | *   | -0.0104 | 0.0543  | 0.733                                  | *** | -0.4449 | -1.53  | 0.757                                      | *** |
| RNF                            | LLS               | 18 | 0.051                       | ns  | -0.0274 | 0.2636  | 0.211                                  | +   | -0.2143 | -0.694 | 0.260                                      | *   |
| RBUE                           | LLS               | 18 | 0.311                       | *   | -1.366  | 7.689   | 0.674                                  | *** | -0.3698 | 0.66   | 0.624                                      | *** |
| WM                             | LLS               | 18 | 0.815                       | *** | 11.33   | 16.09   | 0.88                                   | *** | 0.4968  | 1.506  | 0.828                                      | *** |
| WMF                            | LLS               | 18 | 0.295                       | *   | 0.0545  | 0.3814  | 0.338                                  | *   | 0.196   | -0.321 | 0.078                                      | ns  |
| WN                             | LLS               | 18 | 0.597                       | *** | 0.0044  | 0.00202 | 0.422                                  | **  | 0.5908  | -2.108 | 0.314                                      | *   |
| WNF                            | LLS               | 18 | 0.559                       | *** | 0.0337  | 0.02472 | 0.318                                  | *   | 0.5613  | -1.153 | 0.185                                      | +   |
| WNC                            | LLS               | 18 | 0                           | ns  | -0.0779 | 0.49    | 0.054                                  | ns  | -0.3662 | -0.514 | 0.040                                      | ns  |
| P <sub>mass</sub>              | P <sub>area</sub> | 26 | 0.699                       | *** | 46.36   | -267.3  | 0.777                                  | *** | 1.932   | 0.296  | 0.608                                      | *** |
| PNUE                           | P <sub>area</sub> | 26 | 0.751                       | *** | 11.6    | -24.11  | 0.8                                    | *** | 1.12    | 0.845  | 0.689                                      | *** |
| N <sub>area</sub>              | P <sub>area</sub> | 26 | 0                           | ns  | 0.0043  | 0.05588 | 0                                      | ns  | 0.5078  | -1.505 | 0.053                                      | ns  |
| N <sub>mass</sub>              | P <sub>area</sub> | 26 | 0.603                       | *** | 0.2056  | 0.4712  | 0.648                                  | *** | 0.8668  | -0.462 | 0.360                                      | **  |
| g <sub>s</sub>                 | P <sub>area</sub> | 26 | 0.726                       | *** | 0.0734  | -0.5485 | 0.877                                  | *** | 2.089   | -2.844 | 0.792                                      | *** |
| C <sub>i</sub> /C <sub>a</sub> | P <sub>area</sub> | 26 | 0.59                        | *** | 0.0184  | 0.4785  | 0.604                                  | *** | 0.3214  | -0.492 | 0.410                                      | *** |
| R <sub>area</sub>              | P <sub>area</sub> | 23 | 0.114                       | ns  | 0.1096  | 0.7472  | 0.147                                  | +   | 0.6932  | -0.423 | 0.123                                      | ns  |
| R <sub>mass</sub>              | P <sub>area</sub> | 23 | 0.592                       | *** | 0.0039  | -0.0064 | 0.698                                  | *** | 1.121   | -2.611 | 0.593                                      | *** |
| RNF                            | P <sub>area</sub> | 23 | 0.221                       | *   | 0.0087  | 0.1087  | 0.214                                  | *   | 0.5178  | -1.217 | 0.194                                      | *   |
| RBUE                           | P <sub>area</sub> | 23 | 0.564                       | *** | 0.5185  | -0.2215 | 0.591                                  | *** | 0.9781  | -0.276 | 0.490                                      | *** |
| WM                             | P <sub>area</sub> | 23 | 0.32                        | **  | -3.55   | 75.54   | 0.46                                   | *** | -1.386  | 2.841  | 0.336                                      | **  |
| WMF                            | P <sub>area</sub> | 23 | 0.243                       | *   | -0.0178 | 0.6793  | 0.297                                  | **  | -0.4855 | 0.155  | 0.185                                      | *   |
| WN                             | P <sub>area</sub> | 23 | 0.148                       | +   | -0.0013 | 0.0245  | 0.274                                  | *   | -1.544  | -0.622 | 0.116                                      | ns  |
| WNF                            | P <sub>area</sub> | 23 | 0.178                       | *   | -0.0102 | 0.197   | 0.33                                   | **  | -1.482  | 0.267  | 0.152                                      | +   |
| WNC                            | P <sub>area</sub> | 23 | 0.046                       | ns  | 0.0224  | 0.0696  | 0.023                                  | ns  | 0.7857  | -1.309 | 0.040                                      | ns  |
| PNUE                           | P <sub>mass</sub> | 26 | 0.936                       | *** | 0.2502  | 42.75   | 0.955                                  | *** | 0.5801  | 0.673  | 0.903                                      | *** |
| N <sub>area</sub>              | P <sub>mass</sub> | 26 | 0.193                       | *   | -9E-05  | 0.1401  | 0.163                                  | *   | -0.2629 | -0.356 | 0.109                                      | ns  |
| N <sub>mass</sub>              | P <sub>mass</sub> | 26 | 0.839                       | *** | 0.0044  | 1.656   | 0.927                                  | *** | 0.4488  | -0.595 | 0.828                                      | *** |
| g <sub>s</sub>                 | P <sub>mass</sub> | 26 | 0.735                       | *** | 0.0016  | -0.1256 | 0.886                                  | *** | 1.0814  | -3.164 | 0.810                                      | *** |
| C <sub>i</sub> /C <sub>a</sub> | P <sub>mass</sub> | 26 | 0.781                       | *** | 0.0004  | 0.5843  | 0.806                                  | *** | 0.1664  | -0.541 | 0.689                                      | *** |
| R <sub>area</sub>              | P <sub>mass</sub> | 23 | 0.003                       | ns  | 0.0025  | 1.358   | 0.007                                  | ns  | 0.3687  | -0.551 | 0.000                                      | ns  |
| R <sub>mass</sub>              | P <sub>mass</sub> | 23 | 0.768                       | *** | 9E-05   | 0.0153  | 0.839                                  | *** | 0.5965  | -2.817 | 0.757                                      | *** |
| RNF                            | P <sub>mass</sub> | 23 | 0.248                       | *   | 0.0002  | 0.1574  | 0.179                                  | *   | 0.2754  | -1.312 | 0.123                                      | ns  |
| RBUE                           | P <sub>mass</sub> | 23 | 0.678                       | *** | 0.0119  | 2.669   | 0.776                                  | *** | 0.5203  | -0.456 | 0.723                                      | *** |
| WM                             | P <sub>mass</sub> | 23 | 0.44                        | **  | -0.0811 | 55.75   | 0.825                                  | *** | -0.7372 | 3.096  | 0.792                                      | *** |

|                   |                   |    |           |         |         |           |         |        |           |
|-------------------|-------------------|----|-----------|---------|---------|-----------|---------|--------|-----------|
| WMF               | $P_{\text{mass}}$ | 23 | 0.236 *   | -0.0004 | 0.5801  | 0.346 **  | -0.2583 | 0.244  | 0.130 +   |
| WN                | $P_{\text{mass}}$ | 23 | 0.203 *   | -3E-05  | 0.01721 | 0.552 *** | -0.8211 | -0.338 | 0.423 **  |
| WNF               | $P_{\text{mass}}$ | 23 | 0.193 *   | -0.0002 | 0.1404  | 0.502 *** | -0.7884 | 0.539  | 0.348 **  |
| WNC               | $P_{\text{mass}}$ | 23 | 0.055 ns  | 0.0005  | 0.1947  | 0.018 ns  | 0.4179  | -1.453 | 0.006 ns  |
| $N_{\text{area}}$ | PNUE              | 26 | 0.2 *     | -0.0004 | 0.156   | 0.19 *    | -0.4531 | -0.051 | 0.123 +   |
| $N_{\text{mass}}$ | PNUE              | 26 | 0.682 *** | 0.0177  | 0.8985  | 0.782 *** | 0.7734  | -1.115 | 0.533 *** |
| $g_s$             | PNUE              | 26 | 0.827 *** | 0.0063  | -0.396  | 0.911 *** | 1.8643  | -4.42  | 0.884 *** |
| $C_i/C_a$         | PNUE              | 26 | 0.769 *** | 0.0016  | 0.5167  | 0.818 *** | 0.2869  | -0.734 | 0.740 *** |
| $R_{\text{area}}$ | PNUE              | 23 | 0.001 ns  | 0.0097  | 0.9519  | 0.005 ns  | 0.6344  | -0.978 | 0.002 ns  |
| $R_{\text{mass}}$ | PNUE              | 23 | 0.663 *** | 0.0003  | 0.00089 | 0.773 *** | 1.026   | -3.509 | 0.624 *** |
| RNF               | PNUE              | 23 | 0.272 *   | 0.0008  | 0.125   | 0.218 *   | 0.4739  | -1.631 | 0.137 +   |
| RBUE              | PNUE              | 23 | 0.697 *** | 0.046   | 0.7472  | 0.777 *** | 0.8951  | -1.058 | 0.774 *** |
| WM                | PNUE              | 23 | 0.417 **  | -0.3146 | 68.91   | 0.727 *** | -1.268  | 3.95   | 0.640 *** |
| WMF               | PNUE              | 23 | 0.171 +   | -0.0016 | 0.6461  | 0.25 *    | -0.4444 | 0.543  | 0.048 ns  |
| WN                | PNUE              | 23 | 0.194 *   | -0.0001 | 0.02206 | 0.454 *** | -1.413  | 0.613  | 0.281 *   |
| WNF               | PNUE              | 23 | 0.171 +   | -0.0009 | 0.178   | 0.377 **  | -1.356  | 1.452  | 0.194 *   |
| WNC               | PNUE              | 0  | 0.241 **  | 0.0013  | -0.02   | 0.033 ns  | 0.7191  | -1.938 | 0.029 ns  |
| $N_{\text{mass}}$ | $N_{\text{area}}$ | 26 | 0.107 ns  | -47.74  | 8.344   | 0.116 +   | -1.707  | -1.203 | 0.068 ns  |
| $g_s$             | $N_{\text{area}}$ | 26 | 0.072 ns  | -17.04  | 2.261   | 0.057 ns  | -4.1135 | -4.632 | 0.017 ns  |
| $C_i/C_a$         | $N_{\text{area}}$ | 26 | 0.174 *   | -4.265  | 1.182   | 0.197 *   | -0.6329 | -0.767 | 0.160 *   |
| $R_{\text{area}}$ | $N_{\text{area}}$ | 23 | 0.418 **  | 26.87   | -0.8101 | 0.428 **  | 1.424   | 1.69   | 0.533 *** |
| $R_{\text{mass}}$ | $N_{\text{area}}$ | 23 | 0.066 ns  | -0.9539 | 0.1487  | 0.056 ns  | -2.304  | -3.66  | 0.017 ns  |
| RNF               | $N_{\text{area}}$ | 23 | 0.018 ns  | -2.144  | 0.4573  | 0.009 ns  | -1.064  | -1.701 | 0.010 ns  |
| RBUE              | $N_{\text{area}}$ | 23 | 0.117 ns  | -127.2  | 20.45   | 0.15 +    | -2.009  | -1.19  | 0.221 *   |
| WM                | $N_{\text{area}}$ | 23 | 0.169 +   | 870.6   | -66     | 0.254 *   | 2.847   | 4.137  | 0.260 *   |
| WMF               | $N_{\text{area}}$ | 23 | 0.001 ns  | -4.368  | 0.9324  | 0.001 ns  | -0.9974 | -1.325 | 0.130 +   |
| WN                | $N_{\text{area}}$ | 23 | 0.098 ns  | 0.3208  | -0.0276 | 0.173 *   | 3.171   | 0.821  | 0.023 ns  |
| WNF               | $N_{\text{area}}$ | 23 | 0.024 ns  | 2.492   | -0.208  | 0.028 ns  | 3.044   | 1.652  | 0.020 ns  |
| WNC               | $N_{\text{area}}$ | 23 | 0.007 ns  | -5.505  | 0.9646  | 0.011 ns  | -1.614  | -2.043 | 0.000 ns  |
| $g_s$             | $N_{\text{mass}}$ | 26 | 0.449 *** | 0.3569  | -0.7167 | 0.74 ***  | 2.4096  | -1.732 | 0.504 *** |
| $C_i/C_a$         | $N_{\text{mass}}$ | 26 | 0.731 *** | 0.0893  | 0.4364  | 0.682 *** | 0.3708  | -0.321 | 0.436 *** |
| $R_{\text{area}}$ | $N_{\text{mass}}$ | 23 | 0.017 ns  | 0.5697  | 0.4159  | 0.007 ns  | 0.8244  | -0.061 | 0.078 ns  |
| $R_{\text{mass}}$ | $N_{\text{mass}}$ | 23 | 0.788 *** | 0.0202  | -0.0181 | 0.815 *** | 1.334   | -2.025 | 0.774 *** |
| RNF               | $N_{\text{mass}}$ | 23 | 0.162 +   | 0.0455  | 0.08223 | 0.112 ns  | 0.6158  | -0.946 | 0.533 *** |
| RBUE              | $N_{\text{mass}}$ | 23 | 0.571 *** | 2.696   | -1.79   | 0.68 ***  | 1.163   | 0.236  | 0.410 **  |
| WM                | $N_{\text{mass}}$ | 23 | 0.626 *** | -18.46  | 86.27   | 0.849 *** | -1.648  | 2.116  | 0.846 *** |
| WMF               | $N_{\text{mass}}$ | 23 | 0.402 **  | -0.0926 | 0.7332  | 0.435 **  | -0.5774 | -0.099 | 0.260 *   |
| WN                | $N_{\text{mass}}$ | 23 | 0.354 **  | -0.0068 | 0.02846 | 0.617 *** | -1.836  | -1.429 | 0.548 *** |
| WNF               | $N_{\text{mass}}$ | 23 | 0.375 **  | -0.0528 | 0.2277  | 0.616 *** | -1.763  | -0.509 | 0.548 *** |
| WNC               | $N_{\text{mass}}$ | 23 | 0.012 ns  | 0.1167  | 0.00173 | 0.005 ns  | 0.9344  | -0.898 | 0.004 ns  |
| $C_i/C_a$         | $g_s$             | 26 | 0.605 *** | 0.2503  | 0.6158  | 0.861 *** | 0.1539  | -0.054 | 0.792 *** |
| $R_{\text{area}}$ | $g_s$             | 23 | 0.016 ns  | 1.507   | 1.573   | 0.06 ns   | 0.3418  | 0.527  | 0.040 ns  |
| $R_{\text{mass}}$ | $g_s$             | 23 | 0.415 **  | 0.0535  | 0.02293 | 0.736 *** | 0.5531  | -1.074 | 0.689 *** |
| RNF               | $g_s$             | 23 | 0.172 *   | 0.1202  | 0.1745  | 0.221 *   | 0.2553  | -0.507 | 0.221 *   |
| RBUE              | $g_s$             | 23 | 0.566 *** | 7.131   | 3.686   | 0.682 *** | 0.4824  | 1.065  | 0.593 *** |
| WM                | $g_s$             | 23 | 0.227 *   | -48.81  | 48.79   | 0.603 *** | -0.6835 | 0.941  | 0.518 *** |
| WMF               | $g_s$             | 23 | 0.134 +   | -0.2449 | 0.5452  | 0.333 **  | -0.2395 | -0.511 | 0.137 +   |
| WN                | $g_s$             | 23 | 0.094 ns  | -0.018  | 0.01465 | 0.336 **  | -0.7613 | -2.738 | 0.176 +   |
| WNF               | $g_s$             | 23 | 0.09 ns   | -0.1397 | 0.1205  | 0.344 **  | -0.7309 | -1.766 | 0.160 +   |
| WNC               | $g_s$             | 23 | 0.063 ns  | 0.3087  | 0.2387  | 0.044 ns  | 0.3875  | -0.232 | 0.053 ns  |
| $R_{\text{area}}$ | $C_i/C_a$         | 23 | 0.007 ns  | 6.626   | -2.592  | 0.004 ns  | 2.392   | 0.667  | 0.000 ns  |
| $R_{\text{mass}}$ | $C_i/C_a$         | 23 | 0.615 *** | 0.2352  | -0.1249 | 0.656 *** | 3.87    | -0.848 | 0.593 *** |
| RNF               | $C_i/C_a$         | 23 | 0.201 *   | 0.5287  | -0.1578 | 0.165 +   | 1.787   | -0.403 | 0.185 *   |
| RBUE              | $C_i/C_a$         | 23 | 0.61 ***  | 31.36   | -16.02  | 0.666 *** | 3.376   | 1.262  | 0.548 *** |
| WM                | $C_i/C_a$         | 23 | 0.503 *** | -214.7  | 183.7   | 0.716 *** | -4.783  | 0.661  | 0.624 *** |
| WMF               | $C_i/C_a$         | 23 | 0.363 **  | -1.077  | 1.222   | 0.388 **  | -1.676  | -0.609 | 0.123 +   |
| WN                | $C_i/C_a$         | 23 | 0.222 *   | -0.0791 | 0.06436 | 0.411 **  | -5.327  | -3.049 | 0.260 **  |
| WNF               | $C_i/C_a$         | 23 | 0.213 *   | -0.6144 | 0.5066  | 0.363 **  | -5.115  | -2.064 | 0.185 *   |
| WNC               | $C_i/C_a$         | 23 | 0.043 ns  | 1.357   | -0.6144 | 0.04 ns   | 2.712   | -0.073 | 0.029 ns  |
| $R_{\text{mass}}$ | $R_{\text{area}}$ | 23 | 0.117 ns  | 0.0355  | -0.0329 | 0.132 +   | 1.618   | -1.927 | 0.144 +   |
| RNF               | $R_{\text{area}}$ | 23 | 0.388 **  | 0.0798  | 0.04904 | 0.465 *** | 0.747   | -0.901 | 0.548 *** |
| RBUE              | $R_{\text{area}}$ | 23 | 0.085 ns  | -4.733  | 16.62   | 0.08 ns   | -1.411  | 1.195  | 0.168 +   |
| WM                | $R_{\text{area}}$ | 23 | 0.031 ns  | 32.4    | -39.75  | 0.032 ns  | 1.9996  | 0.758  | 0.068 ns  |
| WMF               | $R_{\text{area}}$ | 23 | 0.007 ns  | -0.1625 | 0.8008  | 0.006 ns  | -0.7003 | -0.142 | 0.116 ns  |

|      |                   |    |       |     |         |         |       |     |         |        |       |     |
|------|-------------------|----|-------|-----|---------|---------|-------|-----|---------|--------|-------|-----|
| WN   | R <sub>area</sub> | 23 | 0.063 | ns  | 0.0119  | -0.018  | 0.067 | ns  | 2.2267  | -2.941 | 0.102 | ns  |
| WNF  | R <sub>area</sub> | 23 | 0.014 | ns  | 0.0927  | -0.1329 | 0.008 | ns  | 2.1381  | -1.962 | 0.008 | ns  |
| WNC  | R <sub>area</sub> | 23 | 0.093 | ns  | 0.2049  | -0.0835 | 0.028 | ns  | 1.1335  | -0.829 | 0.026 | ns  |
| RNF  | R <sub>mass</sub> | 23 | 0.558 | *** | 2.248   | 0.123   | 0.495 | *** | 0.4617  | -0.011 | 0.490 | *** |
| RBUE | R <sub>mass</sub> | 23 | 0.256 | *   | 133.3   | 0.6286  | 0.384 | **  | 0.8722  | 2.002  | 0.240 | *   |
| WM   | R <sub>mass</sub> | 23 | 0.42  | **  | -912.7  | 69.72   | 0.653 | *** | -1.2359 | -0.386 | 0.563 | *** |
| WMF  | R <sub>mass</sub> | 23 | 0.209 | *   | -4.579  | 0.6501  | 0.263 | *   | -0.4329 | -0.976 | 0.185 | *   |
| WN   | R <sub>mass</sub> | 23 | 0.191 | *   | -0.3363 | 0.02236 | 0.396 | *** | -1.3765 | -4.216 | 0.314 | **  |
| WNF  | R <sub>mass</sub> | 23 | 0.191 | *   | -2.612  | 0.1804  | 0.372 | **  | -1.3215 | -3.185 | 0.325 | **  |
| WNC  | R <sub>mass</sub> | 23 | 0.09  | ns  | 5.771   | 0.1064  | 0.035 | ns  | 0.7008  | 0.521  | 0.003 | ns  |
| RBUE | RNF               | 23 | 0     | ns  | 59.31   | -6.667  | 0     | ns  | -1.889  | -0.507 | 0.012 | ns  |
| WM   | RNF               | 23 | 0.034 | ns  | -406    | 119.7   | 0.059 | ns  | -2.6767 | -0.416 | 0.020 | ns  |
| WMF  | RNF               | 23 | 0.004 | ns  | -2.037  | 0.9007  | 0.002 | ns  | -0.9381 | -0.987 | 0.023 | ns  |
| WN   | RNF               | 23 | 0     | ns  | 0.1496  | -0.0253 | 0.003 | ns  | -2.9815 | -4.249 | 0.000 | ns  |
| WNF  | RNF               | 23 | 0     | ns  | -1.162  | 0.3233  | 0.001 | ns  | -2.862  | -3.217 | 0.000 | ns  |
| WNC  | RNF               | 23 | 0.217 | *   | 2.567   | -0.2094 | 0.105 | ns  | 1.5175  | 0.537  | 0.044 | ns  |
| WM   | RBUE              | 23 | 0.436 | **  | -6.846  | 74.02   | 0.701 | *** | -1.417  | 2.45   | 0.608 | *** |
| WMF  | RBUE              | 23 | 0.25  | *   | -0.0343 | 0.6717  | 0.299 | **  | -0.4965 | 0.018  | 0.029 | ns  |
| WN   | RBUE              | 23 | 0.244 | *   | -0.0025 | 0.02395 | 0.531 | *** | -1.5783 | -1.057 | 0.336 | **  |
| WNF  | RBUE              | 23 | 0.224 | *   | -0.0196 | 0.1927  | 0.459 | *** | -1.5154 | -0.152 | 0.212 | *   |
| WNC  | RBUE              | 23 | 0.001 | ns  | 0.0433  | 0.07919 | 0.002 | ns  | 0.8032  | -1.088 | 0.005 | ns  |
| WMF  | WM                | 23 | 0.462 | *** | 0.005   | 0.3004  | 0.534 | *** | 0.3503  | -0.841 | 0.212 | *   |
| WN   | WM                | 23 | 0.789 | *** | 0.0004  | -0.0033 | 0.721 | *** | 1.114   | -3.786 | 0.656 | *** |
| WNF  | WM                | 23 | 0.723 | *** | 0.0029  | -0.0192 | 0.602 | *** | 1.069   | -2.772 | 0.518 | *** |
| WNC  | WM                | 23 | 0.002 | ns  | 0.0063  | 0.1679  | 0.008 | ns  | -0.5669 | 0.302  | 0.004 | ns  |
| WN   | WMF               | 23 | 0.24  | *   | 0.0734  | -0.0254 | 0.354 | **  | 3.1797  | -1.114 | 0.090 | ns  |
| WNF  | WMF               | 23 | 0.303 | **  | 0.5705  | -0.1905 | 0.444 | **  | 3.0525  | -0.206 | 0.240 | *   |
| WNC  | WMF               | 23 | 0.007 | ns  | -1.26   | 0.9259  | 0.005 | ns  | -1.618  | -1.059 | 0.001 | ns  |
| WNF  | WN                | 23 | 0.958 | *** | 7.768   | 0.00667 | 0.914 | *** | 0.9601  | 0.863  | 0.884 | *** |
| WNC  | WN                | 23 | 0.177 | *   | 17.16   | 0.2249  | 0.199 | *   | 0.509   | 0.668  | 0.397 | **  |
| WNC  | WNF               | 23 | 0.209 | *   | 2.21    | 0.2102  | 0.256 | *   | 0.5301  | 0.211  | 0.449 | *** |

LMA, leaf mass per area ( $\text{g m}^{-2}$ ); LLS, leaf life span (year); P<sub>area</sub>, photosynthetic rate per area ( $\mu\text{mol m}^{-2} \text{s}^{-1}$ ); P<sub>mass</sub>, photosynthetic rate per mass ( $\text{nmol g}^{-1} \text{s}^{-1}$ ); PNUE, photosynthetic nitrogen use efficiency ( $\mu\text{mol mol}^{-1} \text{s}^{-1}$ ); N<sub>area</sub>, leaf nitrogen per area ( $\text{mol m}^{-2}$ ); N<sub>mass</sub>, leaf nitrogen per mass (%); g<sub>s</sub>, stomatal conductance for water vapour ( $\text{mol m}^{-2} \text{s}^{-1}$ ); C<sub>i</sub>/C<sub>a</sub>, the ratio of CO<sub>2</sub> concentration at intercellular space to that at air; R<sub>area</sub>, Rubisco per area ( $\text{g m}^{-2}$ ); R<sub>mass</sub>, Rubisco per leaf mass ( $\text{g g}^{-1}$ ); RNF, Rubisco nitrogen per leaf nitrogen ( $\text{mol mol}^{-1}$ ); RBUE, photosynthetic rate per Rubisco ( $\mu\text{mol g}^{-1} \text{s}^{-1}$ ); WM, cell wall mass per area ( $\text{g m}^{-2}$ ); WMF, cell wall mass per leaf mass ( $\text{g g}^{-1}$ ); WN, cell wall nitrogen per area ( $\text{mol m}^{-2}$ ); WNF, cell wall nitrogen per leaf nitrogen ( $\text{mol mol}^{-1}$ ); WNC, nitrogen concentration of cell wall (%); NA, not available. ns, P $\geq$ 0.1; +, P<0.1; \*, P<0.05; \*\*, P<0.01; \*\*\*, P<0.001
